# Supplementary material for: Wax deposition onto Fe2O3 surfaces
Source: Royal Society of Chemistry journal article supplement (doi:10.1039/b208848g), 2002-12-11
Supplement: b208848g-esi.pdf [file b208848g-esi.pdf]

## SUPPLEMENTARY MATERIAL

### Parameters used in the united-atom (UA) model for alkane chains.

#### Intramolecular Potential Functions

Bond Potential: Constrained

Valence Angle Potential:

$$U(\theta_{jik}) = \frac{k}{2} (\theta_{jik} - \theta_0)^2$$

Dihedral Angle Potential:

$$U(\theta_{jikn}) = A_i [1 + \cos(m_i \theta_{jikn})]$$

$i=1,6$

#### Intermolecular Potential Functions

Short Ranged Potential:

$$U(r_{ij}) = 4\epsilon \left[ \left( \frac{\sigma}{r_{ij}} \right)^{12} - \left( \frac{\sigma}{r_{ij}} \right)^6 \right]$$

Long Ranged Electrostatic Potential:

$$U(r_{ij}) = \frac{q_i q_j e^2}{r_{ij}} + \frac{e^2}{n(\sigma_i + \sigma_j)} \left( \frac{\sigma_i + \sigma_j}{r_{ij}} \right)^9$$

#### Bond Parameters

| Bond | Length (Å) |
|------|------------|
| C-C  | 1.53       |

#### Valence Angle Parameters

| Bond  | $k$ (kJ mol <sup>-1</sup> rad <sup>-2</sup> ) | $\theta$ (deg) |
|-------|-----------------------------------------------|----------------|
| C-C-C | 520.0                                         | 112.5          |

## Dihedral Angle Parameters

| <b>C-C-C-C torsion, <i>i</i></b> | <b><i>M<sub>I</sub></i></b> | <b><i>A<sub>I</sub></i></b> |
|----------------------------------|-----------------------------|-----------------------------|
| 1                                | 0                           | -9.840                      |
| 2                                | 1                           | 9.823                       |
| 3                                | 2                           | 6.560                       |
| 4                                | 3                           | 10.607                      |
| 5                                | 4                           | 3.280                       |
| 6                                | 5                           | 1.968                       |

## Short Ranged Parameters

| <b>Pair</b>                       | <b><math>\epsilon</math> (kJ mol<sup>-1</sup>)</b> | <b><math>\sigma</math> (Å)</b> |
|-----------------------------------|----------------------------------------------------|--------------------------------|
| CH <sub>3</sub> - CH <sub>3</sub> | 0.64230                                            | 3.7400                         |
| CH <sub>3</sub> -CH <sub>2</sub>  | 0.62009                                            | 3.8230                         |
| CH <sub>2</sub> -CH <sub>2</sub>  | 0.59864                                            | 3.9230                         |
| Fe- CH <sub>3</sub>               | 0.38450                                            | 3.8920                         |
| O-CH <sub>2</sub>                 | 0.37120                                            | 3.9835                         |
| O- CH <sub>3</sub>                | 0.50710                                            | 3.3870                         |
| O-CH <sub>2</sub>                 | 0.48960                                            | 3.4785                         |

## Long Ranged Parameters

| <b>Atom</b>     | <b><i>q</i> (e)</b> | <b><math>\sigma</math> (Å)</b> |
|-----------------|---------------------|--------------------------------|
| Fe              | 2.6175              | 0.785                          |
| O               | -1.7450             | 1.240                          |
| CH <sub>2</sub> | 0.0                 | -                              |
| CH <sub>3</sub> | 0.0                 | -                              |
